# Supplementary material
Source: PubMed Central journal article supplement (PMC6570568)
Supplement: NIHMS1015695-supplement-Supp_FigS1-2.pdf [file NIHMS1015695-supplement-Supp_FigS1-2.pdf]

## EEG Predictors of Dreaming Outside of REM Sleep

### Supplemental Figures

#### Supplemental Figure S1. Relative Power by Recall Category at Sleep Onset.

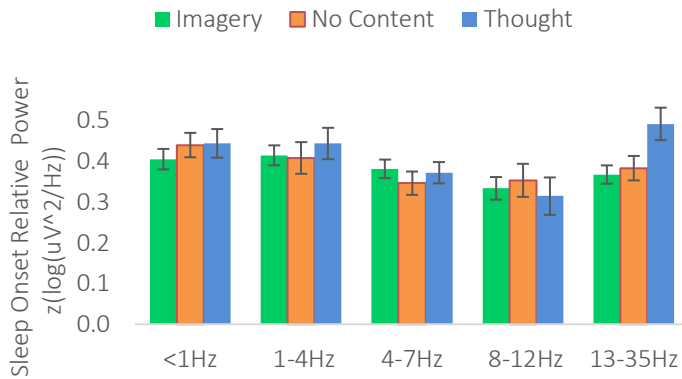

**Figure S1. Absolute Power by Recall Category at Sleep Onset.** Following Benjamini-Hochberg correction for multiple comparisons, spectral power did not differ significantly between *Thought*, *Imagery* and *No Content* reports at sleep onset, in any frequency band. Error bars =  $\pm$ SEM; relative power ( $z(\log(uV^2/Hz)/\text{total power})$ ).

#### Supplemental Figure S2. Absolute Power by Recall Category in N2 and REM Sleep.

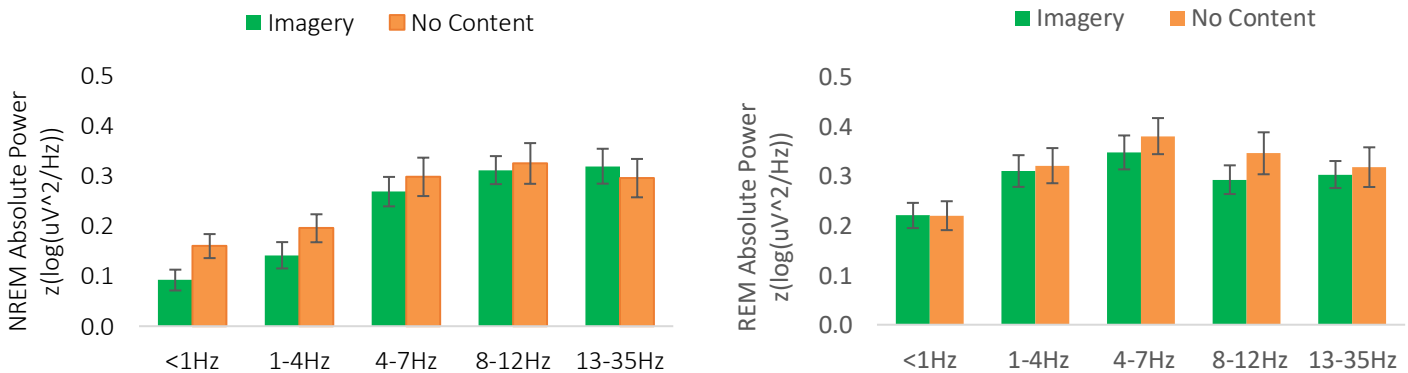

**Figure S2. Absolute Power by Recall Category in N2 and REM Sleep.** *Left:* Following Benjamini-Hochberg correction for multiple comparisons, spectral power did not differ significantly between *Imagery* and *No Content* reports from N2 sleep, in any frequency band. *Right:* Following Benjamini-Hochberg correction for multiple comparisons, spectral power did not differ significantly between *Imagery* and *No Content* reports from REM sleep, in any frequency band. Error bars =  $\pm$ SEM; relative power ( $z(\log(uV^2/Hz)/\text{total power})$ ).
